# Supplementary material for: Improving film uniformity and interface solvent resistance to realize multilayer printing of OLED devices
Source: Royal Society of Chemistry journal article supplement (doi:10.1039/d3tc04465c), 2024-01-01
Supplement: d3tc04465c1.pdf [file d3tc04465c1.pdf]

1  
2  
3  
4  
5  
6  
7  
8  
9  
10  
11  
12

## Supporting Information

### **Improving film uniformity and interface solvent resistance to realize multilayer printing of OLED devices**

Xuelei Liu<sup>1,2</sup>, Dong Lv<sup>1,2</sup>, Shumeng Wang<sup>1</sup>, Xinhong Yu<sup>1\*</sup> and  
Yanchun Han<sup>1,2\*</sup>

<sup>1</sup>State Key Laboratory of Polymer Physics and Chemistry, Changchun  
Institute of Applied Chemistry, Chinese Academy of Sciences,  
Changchun, 130022, P. R. China

<sup>2</sup>School of Applied Chemistry and Engineering, University of Science  
and Technology of China, Hefei, 230026, P. R. China

## 1 **Supporting information**

- 2 **Figure S1.** The patterned ITO and the banks on the ITO substrate.
- 3 **Figure S2.** The inkjet printer AD-P-8000 Printing System.
- 4 **Figure S3.** The process of patterning substrate and printing films.
- 5 **Figure S4.** Dissolved spheres of VNPB in 3D Hansen's solubility space.
- 6 **Figure S5.** The spectra of G2P2 dissolved in CB and binary solvent.
- 7 **Figure S6.** Droplet behavior of PEDOT:PSS ink in Optimized waveform.
- 8 **Figure S7.** Droplet behavior of VNPB ink in Optimized waveform.
- 9 **Figure S8.** DSC record of VNPB sample.
- 10 **Figure S9.** The optical image of different ratios of CYC and CHB for  
11 printed VNPB films.
- 12 **Figure S10.** The luminance half-lifetime (LT50) of the devices under 100  
13 cd/m<sup>2</sup>.
- 14 **Table S1.** The  $\delta_D$ ,  $\delta_P$ ,  $\delta_H$  of chlorobenzene and propylene carbonate  
15 solution with different proportions for G2P2.
- 16 **Table S2.** The  $\delta_D$ ,  $\delta_P$ ,  $\delta_H$  of chlorobenzene and n-butanol solution with  
17 different proportions for G2P2.
- 18 **Table S3.** The  $\delta_D$ ,  $\delta_P$ ,  $\delta_H$  of chlorobenzene and acetonitrile solution with  
19 different proportions for G2P2.
- 20 **Table S4.** The  $\delta_D$ ,  $\delta_P$ ,  $\delta_H$  of chlorobenzene and hexadecane solution with  
21 different proportions for VNPB.
- 22 **Table S5.** The  $\delta_D$ ,  $\delta_P$ ,  $\delta_H$  of chlorobenzene and n-butanol solution with

- 1 different proportions for VNPB.
- 2 **Table S6.** The  $\delta_D$ ,  $\delta_P$ ,  $\delta_H$  of chlorobenzene and acetonitrile solution with
- 3 different proportions for VNPB.
- 4 **Table S7.** The optimized printing voltage, pulse length, diameter and
- 5 velocity of the droplets.
- 6 **Table S8.** The thickness of VNPB/PEDOT:PSS film after spin-rinsing
- 7 with different solvents.

8

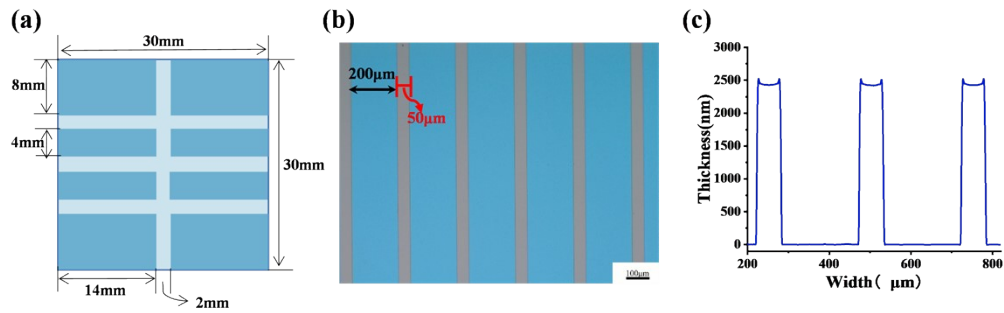

1

2 **Figure S1.** (a) The substrate with ITO patterned on high-transparency glass.

3 (b) The optical image and sizes of the banks on ITO substrate (c) The

4 profile of the bank.

5

6

7

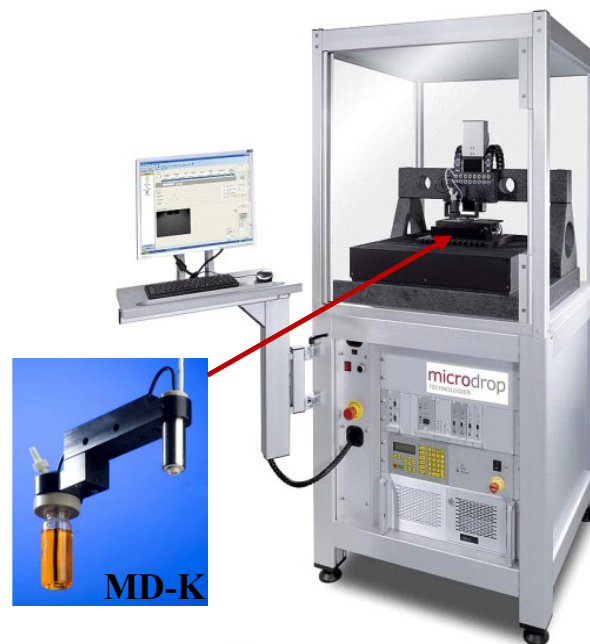

8

9 **Figure S2.** The inkjet printer AD-P-8000 Printing System from Microdrop.

10

11

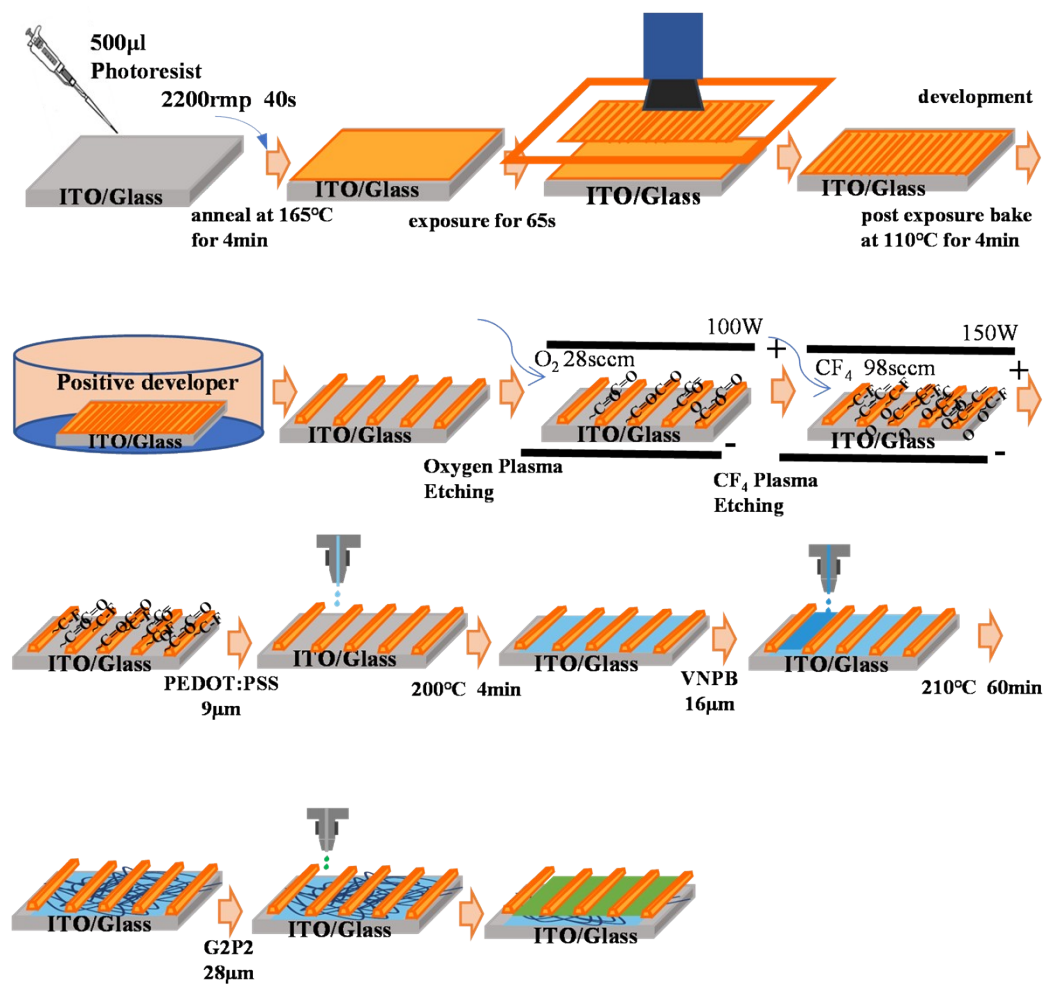

1

2 **Figure S3.** The process of patterning substrate and printing films.

3

1 **Table S1.** The  $\delta_D$ ,  $\delta_P$ ,  $\delta_H$  of chlorobenzene and propylene carbonate  
 2 solution with different proportions, the solution to the G2P2 is recorded as  
 3 1, the insolubility is recorded as 0.

| <b>CB/PC</b> | $\delta_D$<br>(MPa <sup>1/2</sup> ) | $\delta_P$<br>(MPa <sup>1/2</sup> ) | $\delta_H$<br>(MPa <sup>1/2</sup> ) | <b>Score</b> |
|--------------|-------------------------------------|-------------------------------------|-------------------------------------|--------------|
| 100/0        | 19.0                                | 4.3                                 | 2.0                                 | 1            |
| 90/10        | 19.1                                | 5.7                                 | 2.2                                 | 1            |
| 80/20        | 19.2                                | 7.0                                 | 2.4                                 | 1            |
| 70/30        | 19.3                                | 8.4                                 | 2.6                                 | 1            |
| 60/40        | 19.4                                | 9.8                                 | 2.8                                 | 1            |
| 50/50        | 19.5                                | 11.2                                | 3.1                                 | 0            |
| 40/60        | 19.6                                | 12.5                                | 3.3                                 | 0            |
| 30/70        | 19.7                                | 13.9                                | 3.5                                 | 0            |
| 20/80        | 19.8                                | 15.3                                | 3.7                                 | 0            |
| 10/90        | 19.9                                | 16.6                                | 3.9                                 | 0            |
| 0/100        | 20.0                                | 18.0                                | 4.1                                 | 0            |

4

1

2 **Table S2.** The  $\delta_D$ ,  $\delta_P$ ,  $\delta_H$  of chlorobenzene and n-Butanol solution with  
3 different proportions, the solution to the G2P2 is recorded as 1, the  
4 insolubility is recorded as 0.

| <b>CB/n-Butanol</b> | $\delta_D$<br>(MPa <sup>1/2</sup> ) | $\delta_P$<br>(MPa <sup>1/2</sup> ) | $\delta_H$<br>(MPa <sup>1/2</sup> ) | <b>Score</b> |
|---------------------|-------------------------------------|-------------------------------------|-------------------------------------|--------------|
| 100/0               | 19.0                                | 4.3                                 | 2.0                                 | 1            |
| 90/10               | 18.7                                | 4.4                                 | 3.4                                 | 1            |
| 80/20               | 18.4                                | 4.6                                 | 4.8                                 | 1            |
| 70/30               | 18.1                                | 4.7                                 | 6.1                                 | 1            |
| 60/40               | 17.8                                | 4.9                                 | 7.5                                 | 0            |
| 50/50               | 17.5                                | 5.0                                 | 8.9                                 | 0            |
| 40/60               | 17.2                                | 5.1                                 | 10.3                                | 0            |
| 30/70               | 16.9                                | 5.3                                 | 11.7                                | 0            |
| 20/80               | 16.6                                | 5.4                                 | 13.0                                | 0            |
| 10/90               | 16.3                                | 5.6                                 | 14.4                                | 0            |
| 0/100               | 16.0                                | 5.7                                 | 15.8                                | 0            |

5

1 **Table S3.** The  $\delta_D$ ,  $\delta_P$ ,  $\delta_H$  of chlorobenzene and acetonitrile solution with  
 2 different proportions, the solution to the G2P2 is recorded as 1, the  
 3 insolubility is recorded as 0.

| <b>CB/Acetonitrile</b> | $\delta_D$<br>(MPa <sup>1/2</sup> ) | $\delta_P$<br>(MPa <sup>1/2</sup> ) | $\delta_H$<br>(MPa <sup>1/2</sup> ) | <b>Score</b> |
|------------------------|-------------------------------------|-------------------------------------|-------------------------------------|--------------|
| 100/0                  | 19.0                                | 4.3                                 | 2.0                                 | 1            |
| 90/10                  | 18.6                                | 5.7                                 | 2.4                                 | 1            |
| 80/20                  | 18.3                                | 7.0                                 | 2.8                                 | 1            |
| 70/30                  | 17.9                                | 8.4                                 | 3.2                                 | 1            |
| 60/40                  | 17.5                                | 9.8                                 | 3.6                                 | 1            |
| 50/50                  | 17.2                                | 11.2                                | 4.1                                 | 0            |
| 40/60                  | 16.8                                | 12.5                                | 4.5                                 | 0            |
| 30/70                  | 16.4                                | 13.9                                | 4.9                                 | 0            |
| 20/80                  | 16.0                                | 15.3                                | 5.3                                 | 0            |
| 10/90                  | 15.7                                | 16.6                                | 5.7                                 | 0            |
| 0/100                  | 15.3                                | 18.0                                | 6.1                                 | 0            |

4



(a)

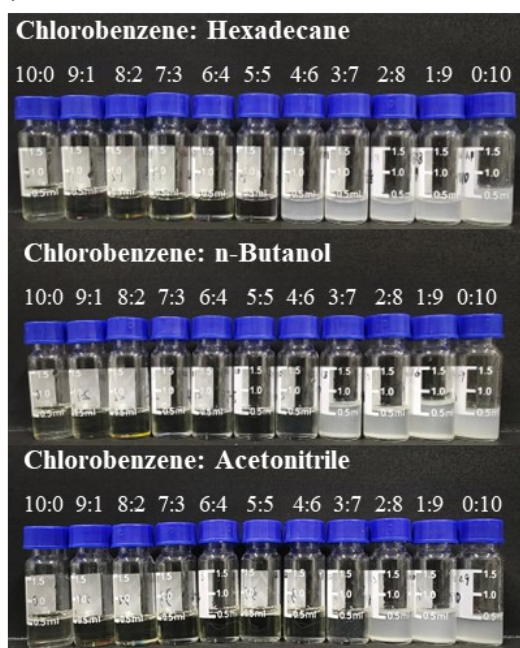

(b)

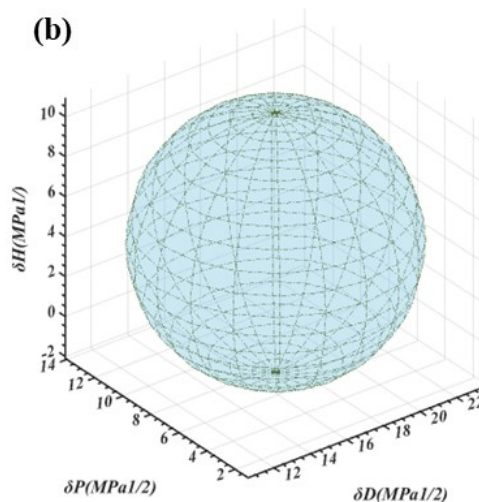

VNPB

(17.1,7.6,4.4) MPa<sup>1/2</sup>

$R_0=6.5$  MPa<sup>1/2</sup>

1

2

3 **Figure S4.** (a) Binary solvents with different ratios of chlorobenzene

4 and hexadecane, chlorobenzene and n-butanol, chlorobenzene and

5 acetonitrile in which the concentration of VNPB is 2 mg/ml. (b) Dissolved

6 spheres of VNPB in 3D Hansen's solubility space.

7

1 **Table S4.** The  $\delta_D$ ,  $\delta_P$ ,  $\delta_H$  of chlorobenzene and hexadecane solution with  
 2 different proportions, the solution to the VNPB is recorded as 1, the  
 3 insolubility is recorded as 0.

| <b>CB/Hexadecane</b> | $\delta_D$<br>(MPa <sup>1/2</sup> ) | $\delta_P$<br>(MPa <sup>1/2</sup> ) | $\delta_H$<br>(MPa <sup>1/2</sup> ) | <b>Score</b> |
|----------------------|-------------------------------------|-------------------------------------|-------------------------------------|--------------|
| 100/0                | 19.0                                | 4.3                                 | 2.0                                 | 1            |
| 90/10                | 18.7                                | 3.9                                 | 1.8                                 | 1            |
| 80/20                | 18.5                                | 3.4                                 | 1.6                                 | 1            |
| 70/30                | 18.2                                | 3.0                                 | 1.4                                 | 1            |
| 60/40                | 17.9                                | 2.6                                 | 1.2                                 | 1            |
| 50/50                | 17.7                                | 2.2                                 | 1.0                                 | 1            |
| 40/60                | 17.4                                | 1.7                                 | 0.8                                 | 0            |
| 30/70                | 17.1                                | 1.3                                 | 0.6                                 | 0            |
| 20/80                | 16.8                                | 0.9                                 | 0.4                                 | 0            |
| 10/90                | 16.6                                | 0.4                                 | 0.2                                 | 0            |
| 0/100                | 16.3                                | 0.0                                 | 0.0                                 | 0            |

4

5

1 **Table S5.** The  $\delta_D$ ,  $\delta_P$ ,  $\delta_H$  of chlorobenzene and n-Butanol solution with  
 2 different proportions, the solution to the VNPB is recorded as 1, the  
 3 insolubility is recorded as 0.

| <b>CB/n-Butanol</b> | $\delta_D$<br>(MPa <sup>1/2</sup> ) | $\delta_P$<br>(MPa <sup>1/2</sup> ) | $\delta_H$<br>(MPa <sup>1/2</sup> ) | <b>Score</b> |
|---------------------|-------------------------------------|-------------------------------------|-------------------------------------|--------------|
| 100/0               | 19                                  | 4.3                                 | 2.0                                 | 1            |
| 90/10               | 18.7                                | 4.4                                 | 3.4                                 | 1            |
| 80/20               | 18.4                                | 4.6                                 | 4.8                                 | 1            |
| 70/30               | 18.1                                | 4.7                                 | 6.1                                 | 1            |
| 60/40               | 17.8                                | 4.9                                 | 7.5                                 | 1            |
| 50/50               | 17.5                                | 5.0                                 | 8.9                                 | 1            |
| 40/60               | 17.2                                | 5.1                                 | 10.3                                | 1            |
| 30/70               | 16.9                                | 5.3                                 | 11.7                                | 0            |
| 20/80               | 16.6                                | 5.4                                 | 13.0                                | 0            |
| 10/90               | 16.3                                | 5.6                                 | 14.4                                | 0            |
| 0/100               | 16.0                                | 5.7                                 | 15.8                                | 0            |

4  
5

1 **Table S6.** The  $\delta_D$ ,  $\delta_P$ ,  $\delta_H$  of chlorobenzene and acetonitrile solution with  
 2 different proportions, the solution to the VNPB is recorded as 1, the  
 3 insolubility is recorded as 0.

| <b>CB/Acetonitrile</b> | $\delta_D$<br>(MPa <sup>1/2</sup> ) | $\delta_P$<br>(MPa <sup>1/2</sup> ) | $\delta_H$<br>(MPa <sup>1/2</sup> ) | <b>Score</b> |
|------------------------|-------------------------------------|-------------------------------------|-------------------------------------|--------------|
| 100/0                  | 19.0                                | 4.3                                 | 2.0                                 | 1            |
| 90/10                  | 18.6                                | 5.7                                 | 2.4                                 | 1            |
| 80/20                  | 18.3                                | 7.0                                 | 2.8                                 | 1            |
| 70/30                  | 17.9                                | 8.4                                 | 3.2                                 | 1            |
| 60/40                  | 17.5                                | 9.8                                 | 3.6                                 | 1            |
| 50/50                  | 17.2                                | 11.2                                | 4.1                                 | 1            |
| 40/60                  | 16.8                                | 12.5                                | 4.5                                 | 1            |
| 30/70                  | 16.4                                | 13.9                                | 4.9                                 | 1            |
| 20/80                  | 16.0                                | 15.3                                | 5.3                                 | 0            |
| 10/90                  | 15.7                                | 16.6                                | 5.7                                 | 0            |
| 0/100                  | 15.3                                | 18.0                                | 6.1                                 | 0            |

4

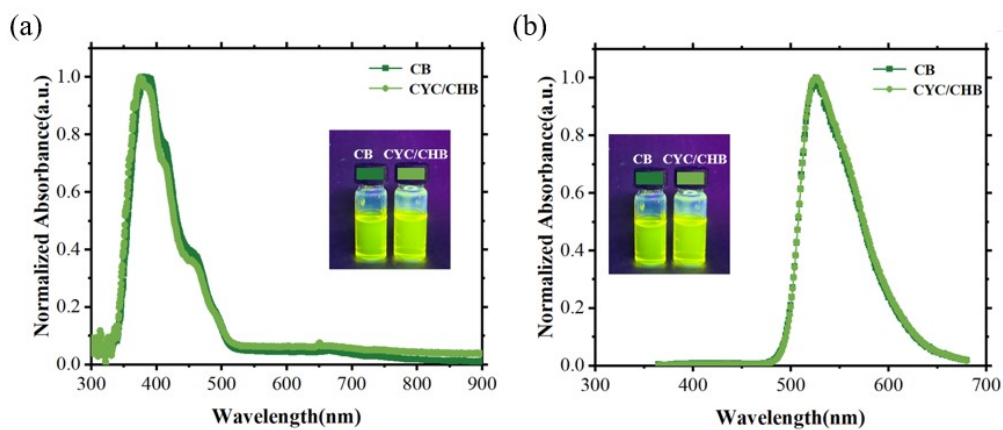

1

2 **Figure S5.** (a) Absorption spectra and (b) Photoluminescence spectra of  
3 G2P2 dissolved in CB and binary solvent.

4

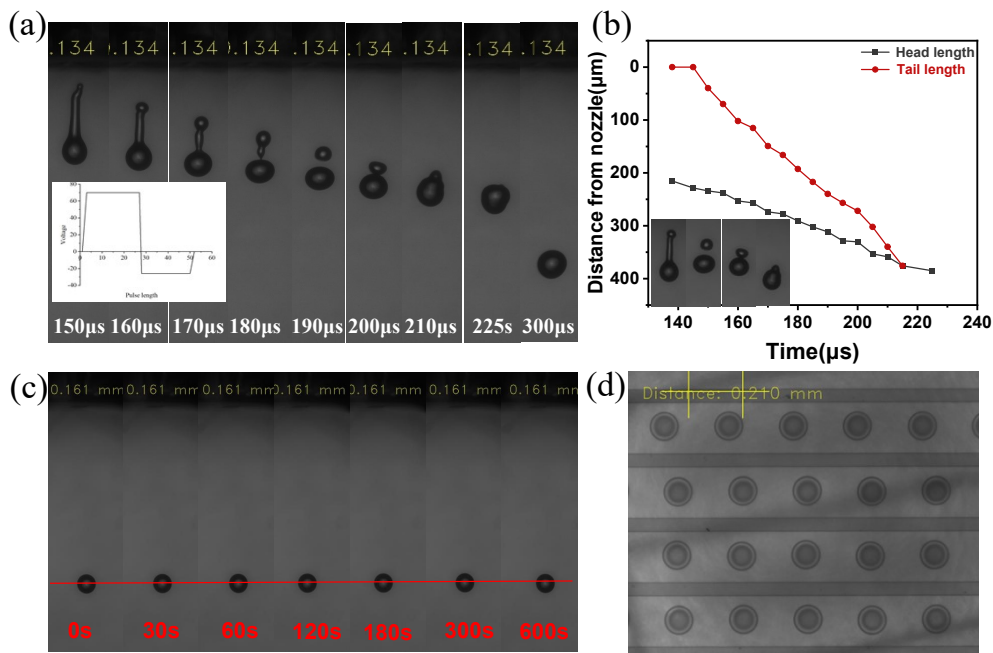

1

2 **Figure S6.** (a) Droplet behavior of PEDOT:PSS ink in an optimized  
 3 waveform. (b) The distance of the head droplet and the tail droplet from  
 4 the nozzle. (c) Images of the drop after applying the waveform at times of  
 5 0s, 30s, 60s, 120s, 180s, 300s, and 600s. The position of the droplet in a  
 6 period does not change. (d) Image of the position of the PEDOT:PSS  
 7 droplets in the bank.

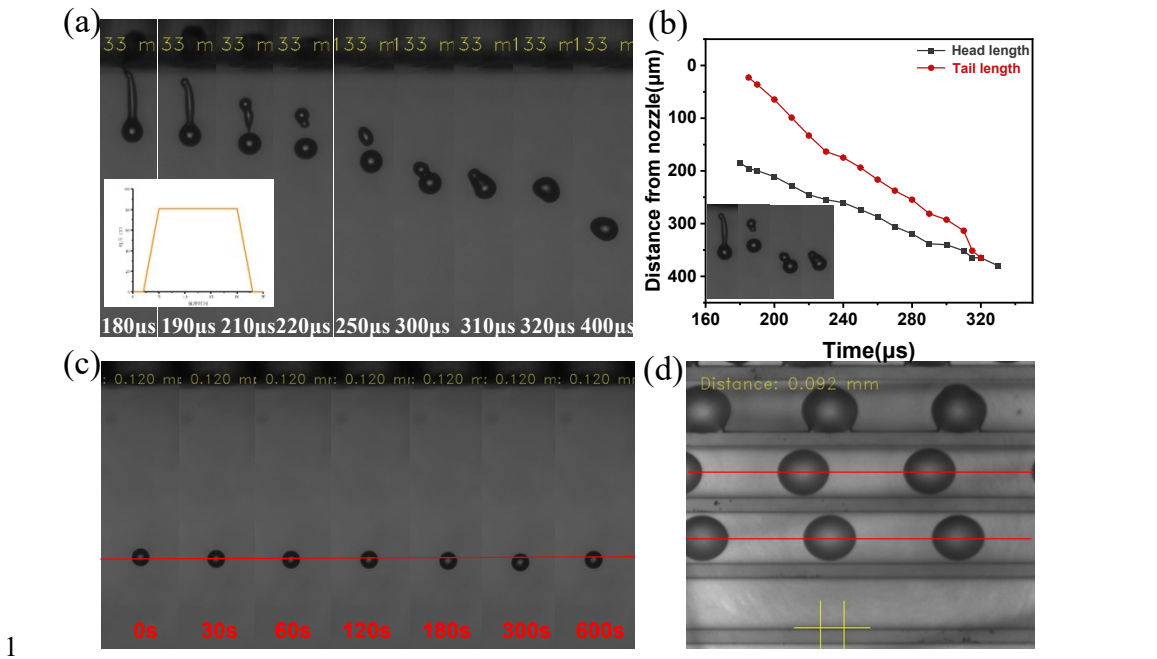

1  
 2 **Figure S7.** (a) Droplet behavior of VNPB ink in an optimized waveform.  
 3 (b) The distance of the head droplet and the tail droplet from the nozzle.  
 4 (c) Images of the drop after applying the waveform at times of 0s, 30s, 60s,  
 5 120s, 180s, 300s, and 600s. The position of the droplet in a period does not  
 6 change. (d) Image of the position of the VNPB droplets in the bank.

7  
 8 **Table S7.** The optimized printing voltage, pulse length, diameter and  
 9 velocity of the droplets.

| Ink       | Voltage<br>(V) | Pulse length<br>( $\mu\text{s}$ ) | Diameter<br>( $\mu\text{m}$ ) | Velocity<br>(m/s) |
|-----------|----------------|-----------------------------------|-------------------------------|-------------------|
| PEDOT:PSS | 70/-24         | 24/20                             | 86                            | 1.7               |
| VNPB      | 77             | 33                                | 79                            | 1.7               |
| G2P2      | 79             | 33                                | 79                            | 1.5               |

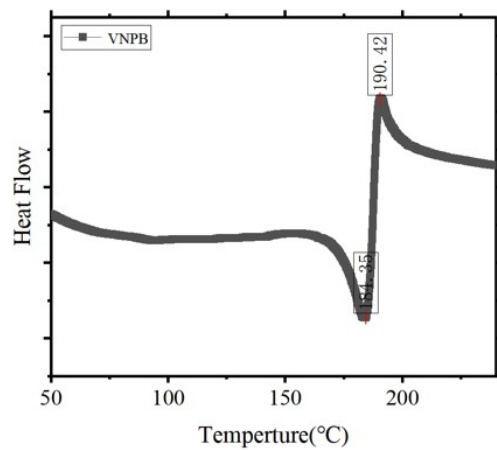

1

2 **Figure S8.** DSC record of VNPB sample. The peak at 190°C  
3 corresponds to the thermal polymerization of VNPB.

4



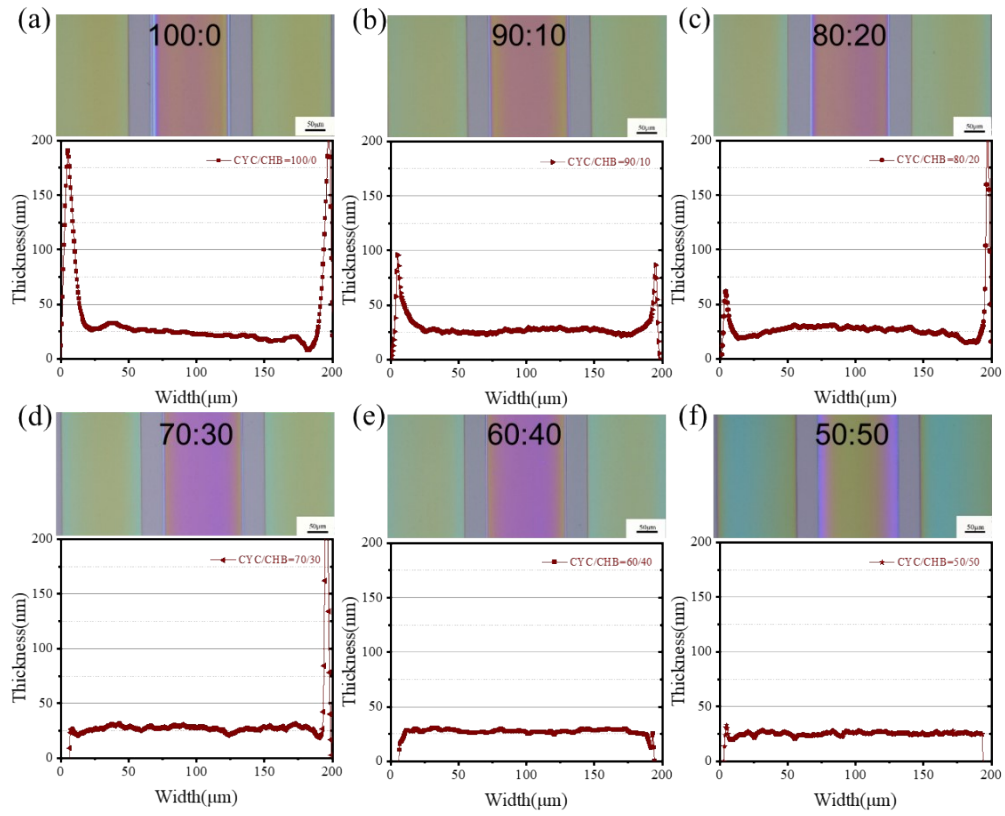

1

2 **Figure S9.** The fluorescence images and the profiles of different CYC and  
 3 CHB ratios of (a) 100:0, (b) 90:10, (c) 80:20, (d) 70:30, (e) 60:40, and (f)  
 4 50:50 for printed VNPB films.

5

1 **Table S8.** The thickness of VNPB/PEDOT:PSS film after spin-rinsing  
 2 with different solvents.

|                      | Thickness(nm) |      |      |      |      | Average<br>(nm) |
|----------------------|---------------|------|------|------|------|-----------------|
|                      | 1             | 2    | 3    | 4    | 5    |                 |
| Pristine             | 54.3          | 51.4 | 53.4 | 54.7 | 53.9 | 53.5±1.3        |
| Rinsing with CB      | 47.1          | 45.1 | 45.9 | 45.6 | 43.4 | 45.4±1.3        |
| Rinsing with CYC     | 49.1          | 50.6 | 52.8 | 48.5 | 52.2 | 51.0±1.9        |
| Rinsing with IPB     | 47.9          | 48.8 | 47.5 | 48.1 | 46.2 | 47.6±1.0        |
| Rinsing with MB      | 47.6          | 48.9 | 46.5 | 46.3 | 46.4 | 47.3±1.2        |
| Rinsing with CHB     | 50.1          | 52.5 | 51.3 | 51.7 | 52.3 | 51.6±1.0        |
| Rinsing with CYC/CHB | 52.4          | 49.4 | 51.4 | 50.5 | 51.3 | 51.0±1.1        |

3

4

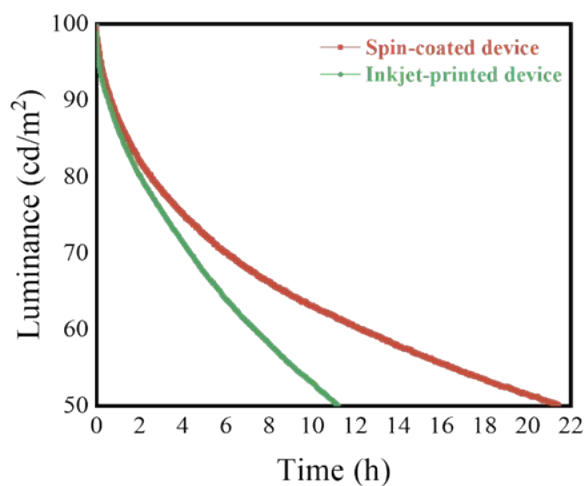

5

6 **Figure S10.** The luminance half-lifetime (LT50) of the devices under 100  
 7 cd/m<sup>2</sup>.

8
